# Supplementary material
Source: Springer Nature journal article supplement (https://www.springermedizin.de/resource/supplementary/12865_2007_148_MOESM3_ESM.pdf/9428672)

### IL21R exon 3 T46M

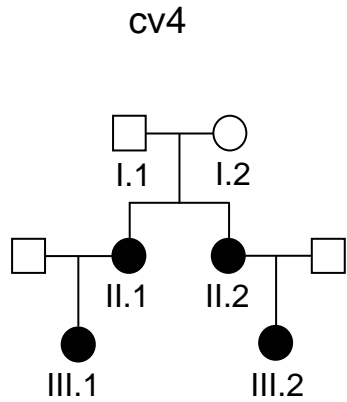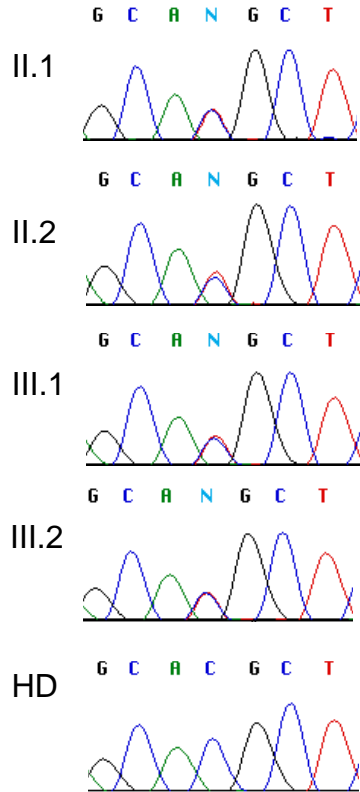

### IL21R exon 8 R275Q

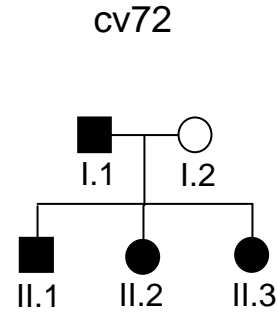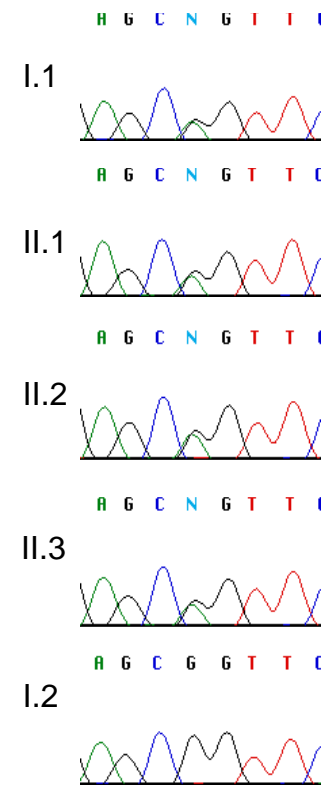

Supplement: MOESM3 [file 9428672]
